# Supplementary material for: Versatile surface charge-mediated anti-fouling UF/MF membrane comprising charged hyperbranched polyglycerols (HPGs) and PVDF membranes
Source: Royal Society of Chemistry journal article supplement (doi:10.1039/c6ra19020k), 2016-01-01
Supplement: c6ra19020k1.pdf [file c6ra19020k1.pdf]

*Supplementary information*

Versatile Surface Charge-Mediated Anti-Fouling UF/MF  
Membrane Comprising Charged Hyperbranched  
Polyglycerols (HPGs) and PVDF Membranes

Sung Yong Park, Ye Ji Kim, and Seung-Yeop Kwak\*

<sup>1</sup> Department of Materials Science and Engineering, Seoul National University,  
599 Gwanak-ro, Gwanak-gu, Seoul 151-744, Korea

\*Corresponding Author:

S.-Y. Kwak (Tel: +82-2-880-8365, Fax: +82-2-885-9671, E-mail:

[sykwak@snu.ac.kr](mailto:sykwak@snu.ac.kr))

### ***Synthesis of N,N-dibenzyl tris(hydroxymethyl) aminomethane (Bz<sub>2</sub>THAM)***

Tris(hydroxymethyl) aminomethane (THAM) was reacted with benzyl bromide to synthesize the benzyl protected three armed initiator i.e., Bz<sub>2</sub>THAM, which protected the amino functional group during anionic polymerization. The Bz<sub>2</sub>THAM was synthesized following description. The benzyl bromide (34 g, 0.2 mol) and the THAM (11 g, 0.09 mol) were dissolved into 150 mL of DMF solvent. After dissolution of the reagents, K<sub>2</sub>CO<sub>3</sub> (27.6 g, 0.1 mol) was added to the above solution. The mixture was refluxed at 105 °C for 3 hours. The residual precipitates were filtered out and DMF solvent was then removed by evaporation. The residual product was dissolved into CHCl<sub>3</sub> and the solution was rinsed with saturated NaHCO<sub>3</sub> aqueous solution to eliminate residual salts. After obtain of CHCl<sub>3</sub> layer, the solvent was removed by evaporation. Next, the crude product was refined by recrystallization from ethyl acetate. The final product was dried under vacuum for overnight.

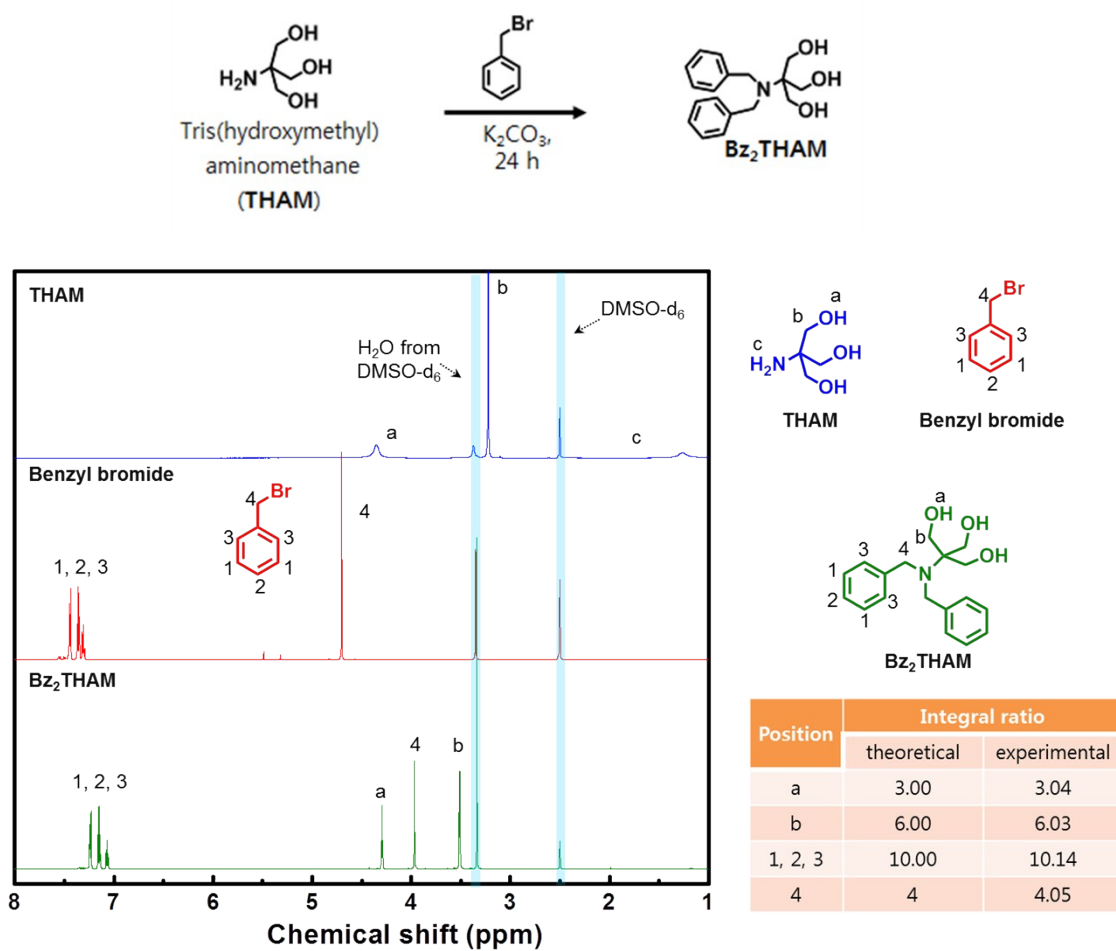

**Fig. S1.** (top) Synthesis scheme and (bottom) <sup>1</sup>H NMR spectra of *N,N*-dibenzyl tris(hydroxymethyl) aminomethane (Bz<sub>2</sub>THAM)

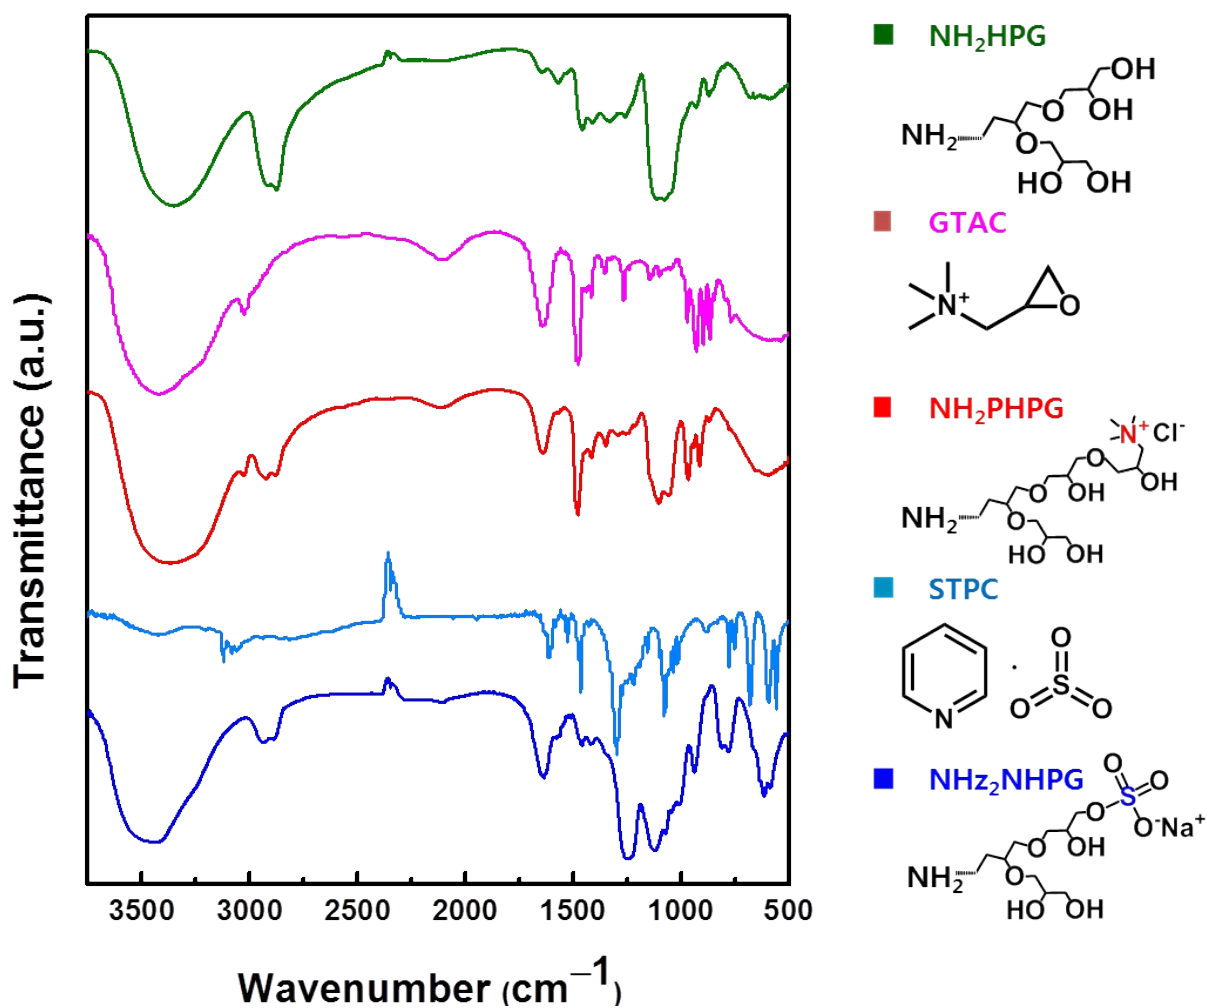

**Fig. S2.** FT-IR spectra of amino functionalized hyperbranched polyglycerol (NH<sub>2</sub>-HPG), glycidyl trimethyl ammonium chloride (GTAC), positively charged modified hyperbranched polyglycerol (PHPG), Sulfur trioxide pyridine complex (STPC) and negatively charged modified hyperbranched polyglycerol (NHPG).

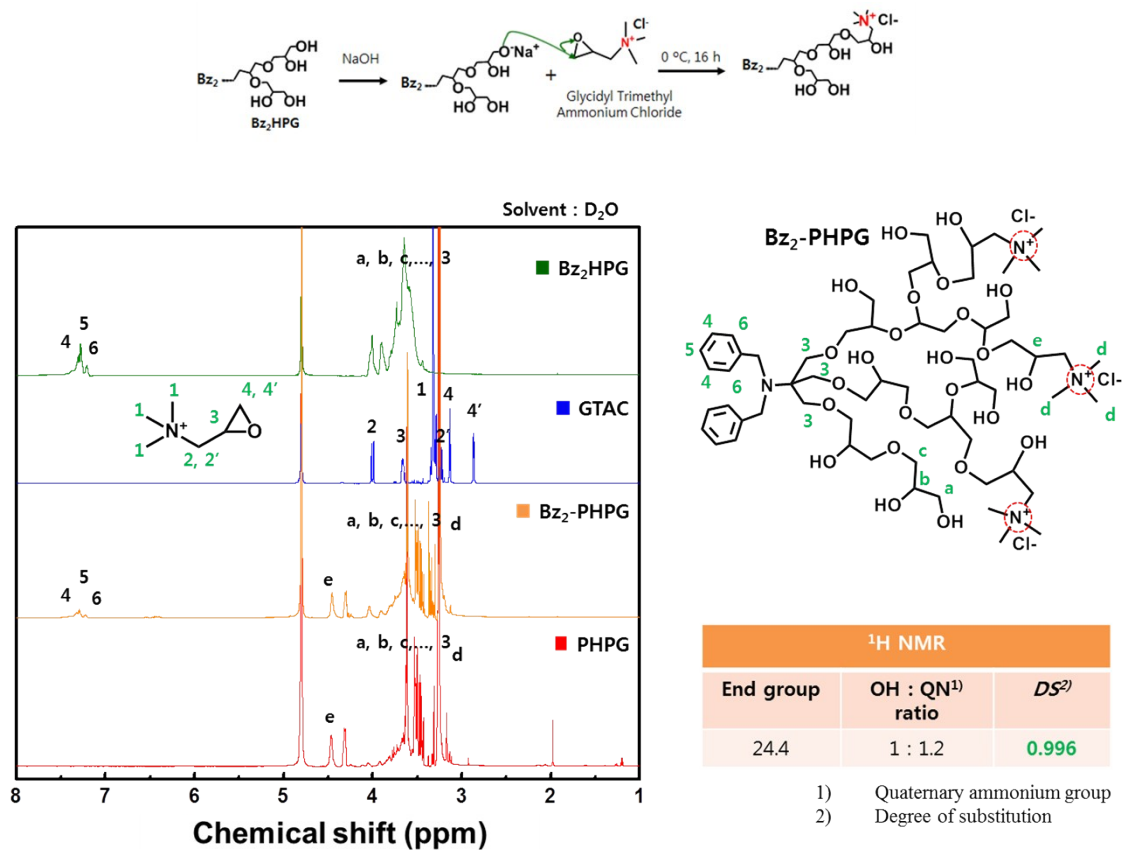

**Fig. S3.** (top) modification scheme for positively charged hyperbranched polyglycerol (PHPG) and (bottom) <sup>1</sup>H NMR spectra of benzyl protected HPG (Bz<sub>2</sub>HPG), GTAC, Benzyl protected PHPG and debenzylated PHPG

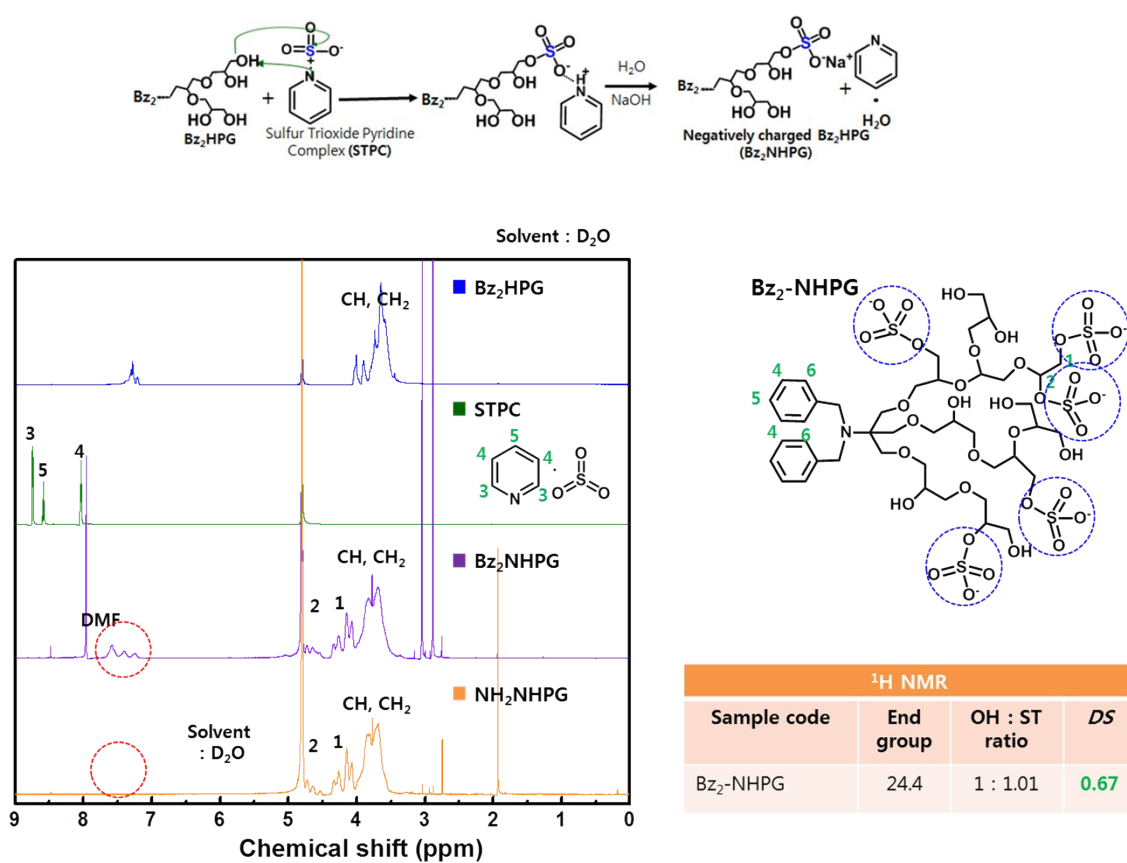

**Fig. S4.** (top) modification scheme for negatively charged hyperbranched polyglycerol (NHPG) and (bottom) <sup>1</sup>H NMR spectra of benzyl protected HPG (Bz<sub>2</sub>HPG), STPC, Benzyl protected NHPG and debenzylated NHPG.

**Table S1.** Atomic concentration of neat-PVDF, PVDF-HPG, PVDF-PHPG and PVDF-NHPG membranes detected by XPS analysis

| <b>Sample</b><br><b>Element</b> | <b>neat-PVDF</b> | <b>PVDF-HPG</b> | <b>PVDF-PHPG</b> | <b>PVDF-NHPG</b> |
|---------------------------------|------------------|-----------------|------------------|------------------|
| C                               | 48.73            | 52.55           | 54.42            | 55.21            |
| N                               | NA               | 3.26            | 3.56             | 3.74             |
| O                               | 1.74             | 16.13           | 14.96            | 13.98            |
| F                               | 49.53            | 28.06           | 27.06            | 26.83            |
| S                               | NA               | NA              | NA               | 0.24             |

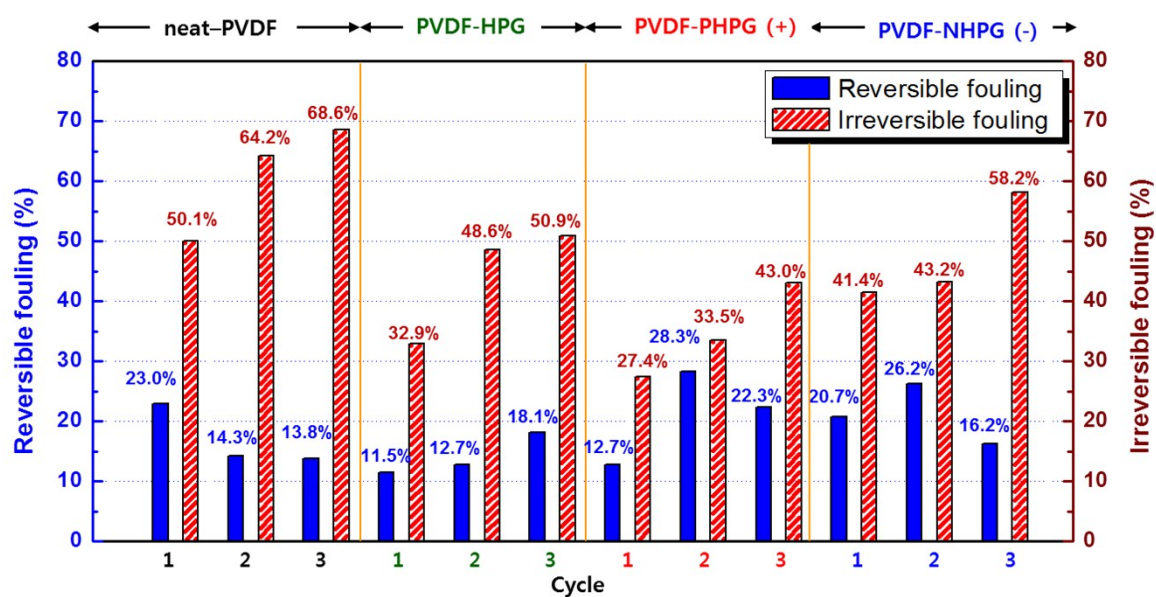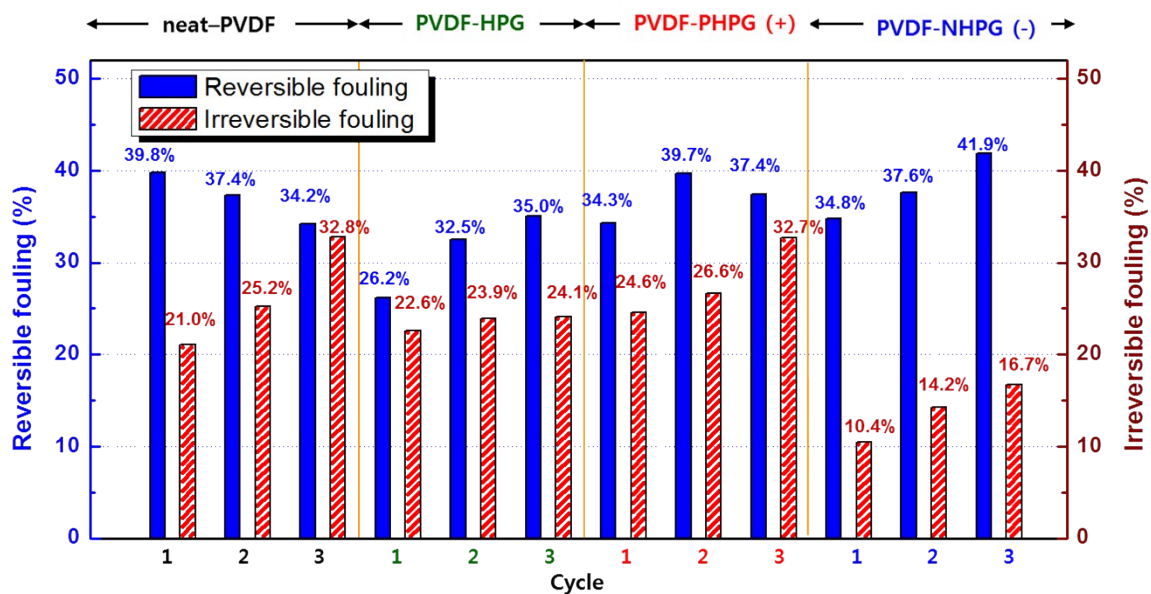

**Fig. S5.** Calculated reversible and irreversible fouling percentages of the neat-PVDF, PVDF-HPG, PVDF-PHPG and PVDF-NHPG for (top) 500 ppm lysozyme (LYZ) and 500 ppm bovine serum albumin (BSA) filtration tests.



**Table S2.** Summary of fouling recovery rate (FRR) for surface modified anti-fouling membranes in the literatures

| Membrane material | Surface modification method                                                | foulants    | FRR (%)                                           | ref        |
|-------------------|----------------------------------------------------------------------------|-------------|---------------------------------------------------|------------|
| PVDF              | Grafting charged hyperbranched polyglycerols                               | BSA<br>LYZ  | 89.6 (BSA, PVDF-NHPG)<br>72.6 (LYZ, PVDF-PHPG)    | This study |
| PVDF              | Blending zwitterion                                                        | BSA         | 61.2 – 81.2                                       | 1          |
| PP                | Grafting zwitterion                                                        | BSA,<br>LYZ | 91.2 (BSA)<br>90.2 (LYZ)                          | 2          |
| PAN               | Grafting zwitterion                                                        | BSA         | 85                                                | 3          |
| PVDF              | Grafting zwitterion                                                        | BSA         | 73-85.1                                           | 4          |
| PAN               | Grafting short-chain amino acid                                            | BSA         | 68.6 (Gly)<br>77.2 (Ser)<br>96.9 (Lys)            | 5          |
| PVDF              | Blending poly( <i>N, N</i> -dimethyl acrylamide)                           | BSA,<br>LYZ | 82 – 95 (BSA)<br>82 – 95 (LYZ)                    | 6          |
| PES               | Blending Pluronic F127 <sup>®</sup>                                        | BSA<br>LYZ  | 91.6 – 94.0 (BSA)<br>88.0 – 91.7 (LYZ)            | 7          |
| Poly(ether imide) | Grafting poly(ethylene glycol)                                             | BSA         | 70.3 – 85.6                                       | 8          |
| PES               | Blending carbon nanotube                                                   | BSA         | 59.5 – 79.4                                       | 9          |
| PSf               | Coating organic/inorganic star-shape polymer                               | BSA         | 94 (30 min filtration)<br>86 (180 min filtration) | 10         |
| PVDF              | Blending hyperbranched polymer functionalized multi-walled carbon nanotube | BSA         | 85.3 – 95.7                                       | 11         |

Abbreviations: PVDF: Poly(vinylidene fluoride), PP: Poly(propylene), PAN: Poly(acrylonitrile), PES: Poly(ether sulfone), PSf: Polysulfone

## References

1. J.-H. Li, M.-Z. Li, J. Miao, J.-B. Wang, X.-S. Shao and Q.-Q. Zhang, *Appl. Surf. Sci.*, 2012, 258, 6398-6405.
2. A. H. E. N.-b. Performance, *J. Phys. Chem. B*, 2010, 114, 2422-2429.
3. H. Meng, Q. Cheng and C. Li, *Appl. Surf. Sci.*, 2014, 303, 399-405.
4. M.-Z. Li, J.-H. Li, X.-S. Shao, J. Miao, J.-B. Wang, Q.-Q. Zhang and X.-P. Xu, *J. Membr. Sci.*, 2012, 405, 141-148.
5. Q. Shi, Y. Su, W. Chen, J. Peng, L. Nie, L. Zhang and Z. Jiang, *J. Membr. Sci.*, 2011, 366, 398-404.
6. X. Yang, B. Zhang, Z. Liu, B. Deng, M. Yu, L. Li, H. Jiang and J. Li, *J. Mater. Chem.*, 2011, 21, 11908-11915.
7. W. Zhao, Y. Su, C. Li, Q. Shi, X. Ning and Z. Jiang, *J. Membr. Sci.*, 2008, 318, 405-412.
8. W. Chinpa, D. Quémener, E. Bèche, R. Jiraratananon and A. Deratani, *J. Membr. Sci.*, 2010, 365, 89-97.
9. E. Celik, L. Liu and H. Choi, *Water Res.*, 2011, 45, 5287-5294.
10. D.-G. Kim, H. Kang, S. Han and J.-C. Lee, *ACS Appl. Mater. Interfaces*, 2012, 4, 5898-5906.
11. X. Zhao, J. Ma, Z. Wang, G. Wen, J. Jiang, F. Shi and L. Sheng, *Desalination*, 2012, 303, 29-38.
